# Supplementary material
Source: Springer Nature journal article supplement (https://www.springermedizin.de/resource/supplementary/12958_2013_1118_MOESM2_ESM.pdf/9566862)

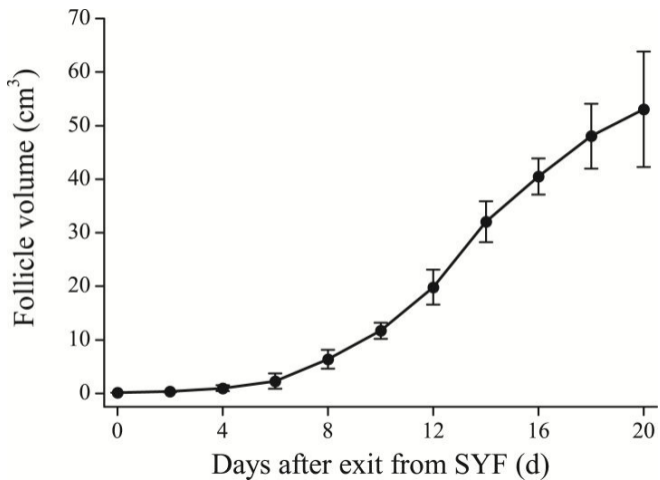

Supplement: MOESM2 [file 9566862]
